# Supplementary material for: Dose-Dependent Pharmacokinetics of Tofacitinib in Rats: Influence of Hepatic and Intestinal First-Pass Metabolism
Source: Pharmaceutics. 2019 Jul 5;11(7):318. doi: 10.3390/pharmaceutics11070318 (PMC6681021; doi:10.3390/pharmaceutics11070318)
Supplement: Supplementary file 1 [file pharmaceutics-11-00318-s001.pdf]

# Supplementary Materials: Dose-Dependent Pharmacokinetics of Tofacitinib in Rats: Influence of Hepatic and Intestinal First-Pass Metabolism

Ji Sang Lee and So Hee Kim \*

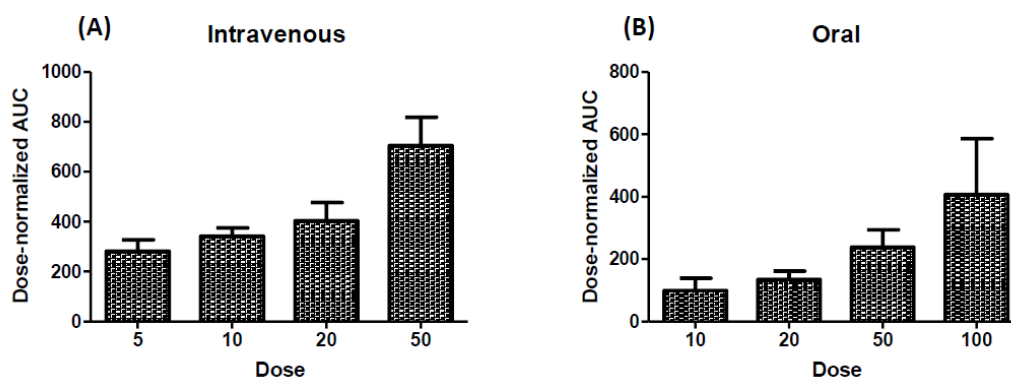

**Figure S1.** Mean dose (mg/kg) versus dose-normalized AUC (μg·min/mL) of tofacitinib in Sprague-Dawley rats after (A) 1-min intravenous infusion of 5 ( $n = 9$ ), 10 ( $n = 8$ ), 20 ( $n = 7$ ), and 50 ( $n = 7$ ) mg/kg tofacitinib and (B) oral administration of 10 ( $n = 7$ ), 20 ( $n = 8$ ), 50 ( $n = 9$ ), and 100 ( $n = 7$ ) mg/kg tofacitinib. Bars represent standard deviations (SD). (A) 20 mg/kg was significantly different ( $p < 0.05$ ) from 5 mg/kg. 50 mg/kg was significantly different ( $p < 0.001$ ) from 5, 10 and 20 mg/kg. (B) 10 mg/kg was significantly different ( $p < 0.05$ ) from 50 mg/kg. 100 mg/kg was significantly different from 10 ( $p < 0.001$ ), 20 ( $p < 0.001$ ) and 50 ( $p < 0.01$ ) mg/kg, respectively.

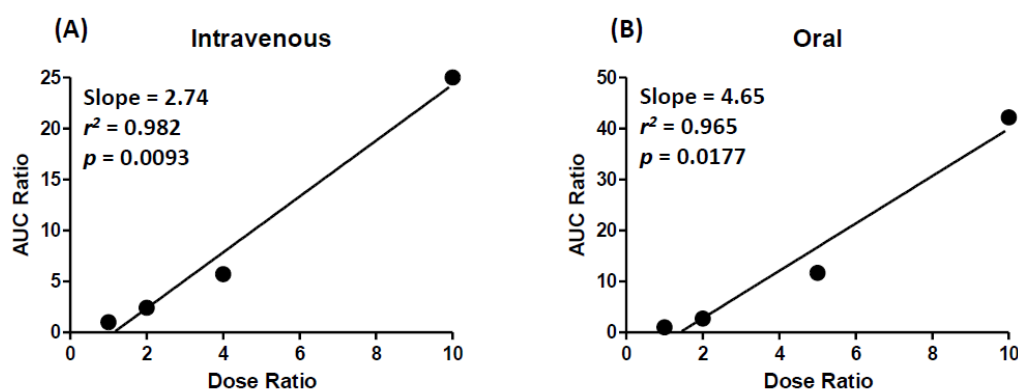

**Figure S2.** Plots of dose versus AUC of tofacitinib in Sprague-Dawley rats after (A) 1-min intravenous infusion of 5, 10, 20, and 50 mg/kg tofacitinib and (B) oral administration of 10, 20, 50, and 100 mg/kg tofacitinib. Dose and AUC ratios were calculated based on 5 and 10 mg/kg dose and respective AUC for intravenous and oral administration, respectively.
